# Supplementary material for: Effects of Long-acting Muscarinic Antagonists on Promoting Ciliary Function in Airway Epithelium
Source: Research Square preprint supplement (doi:10.21203/rs.3.rs-806050/v1), 2021-08-24
Supplement: Supplementary file 1 [file e0265fd37ee084c36867197b.docx]

**Supplementary Information**

**Effects of long-acting muscarinic antagonists on promoting ciliary function in airway epithelium**

**Authors:**

Mineo Katsumata, Tomoyuki. Fujisawa, Yosuke Kamiya, Yuko Tanaka, Chiaki Kamiya, Yusuke Inoue, Hironao Hozumi, Masato Karayama, Yuzo Suzuki, Kazuki Furuhashi, Noriyuki Enomoto, Yutaro Nakamura, Naoki Inui, Masato Maekawa, Mitsutoshi Setou, Hiroshi Watanabe, Koji Ikegami, Takafumi Suda

**Corresponding author;**

*Tomoyuki Fujisawa, MD, PhD

Second Division, Department of Internal Medicine, Hamamatsu University School of Medicine, 1-20-1 Handayama, Higashi-ku, Hamamatsu, 431-3192, Japan

Tel: +81(53)435-2263, FAX: +81(53)435-2354

**E-mail:** [fujisawa@hama-med.ac.jp](mailto:fujisawa@hama-med.ac.jp)

**Additional file 1.**

Cilia-driven flow over the murine tracheal surface using small polystyrene beads under the condition treated with PBS intranasally for 7 days

**Additional file 2.**

Cilia-driven flow under the condition treated with GLY intranasally for 7 days

**Additional file 3.**

Ciliary motility under the condition treated with PBS intranasally for 7 days

**Additional file 4.**

Ciliary motility under the condition treated with GLY intranasally for 7 days

**Additional file 5.**

Figure S1-S2

Figure S1. Changes of intracellular calcium ion concentration by Tapsigargin treatment

Figure S2. ATP concentration in the culture supernatant
